# Supplementary material
Source: bioRxiv or medRxiv preprint supplement (https://www.biorxiv.org/highwire/filestream/24438/field_highwire_adjunct_files/5/087247-5.pdf)

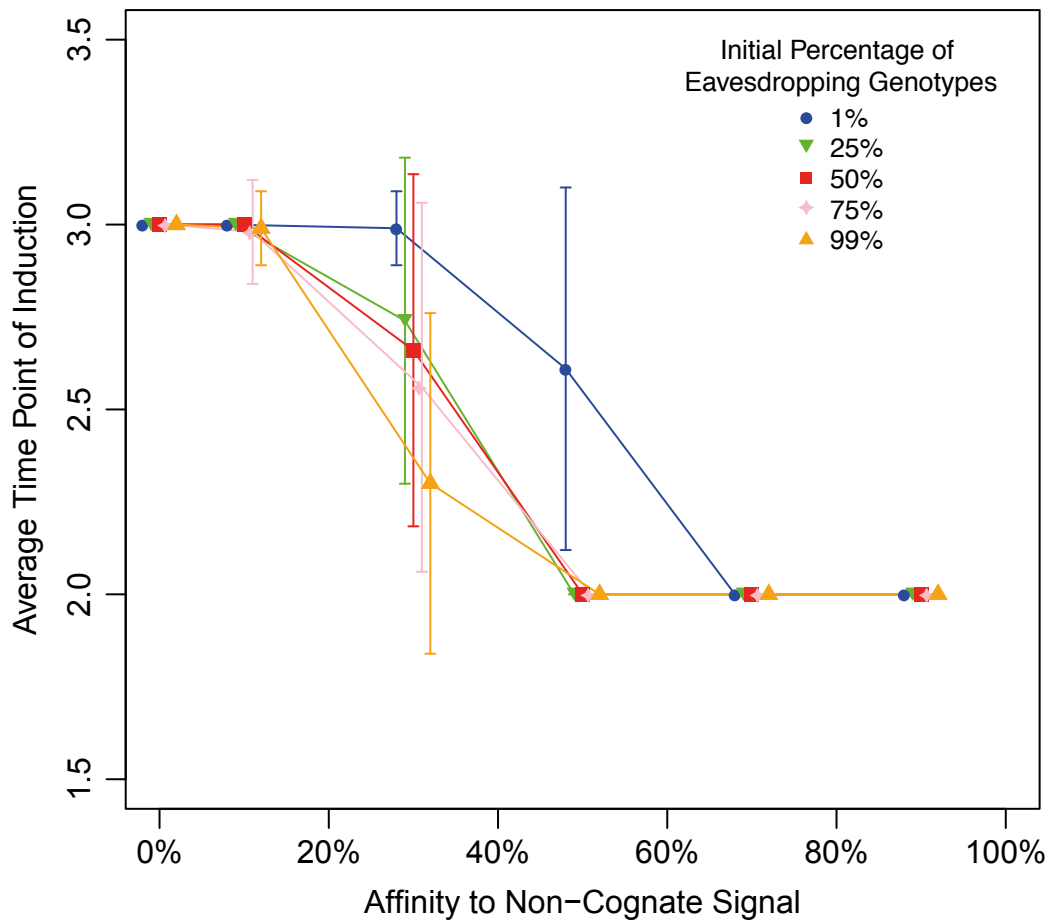

Supplement: Supplementary file [file 087247-5.pdf]
